# Supplementary material for: Using Molecular Networking for Microbial Secondary Metabolite Bioprospecting
Source: PubMed Central journal article supplement (PMC4812331; doi:10.3390/metabo6010002), 2016-01-08
Supplement: metabolites-06-00002-s001.pdf [file metabolites-06-00002-s001.pdf]

# Supplementary Materials: Using Molecular Networking for Microbial Secondary Metabolite Bioprospecting

Kevin Purves, Lynsey Macintyre, Debra Brennan, Guðmundur Ó. Hreggviðsson, Eva Kuttner, Margrét E. Ásgeirsdóttir, Louise C. Young, David H. Green, Ruangelie Edrada-Ebel and Katherine R. Duncan

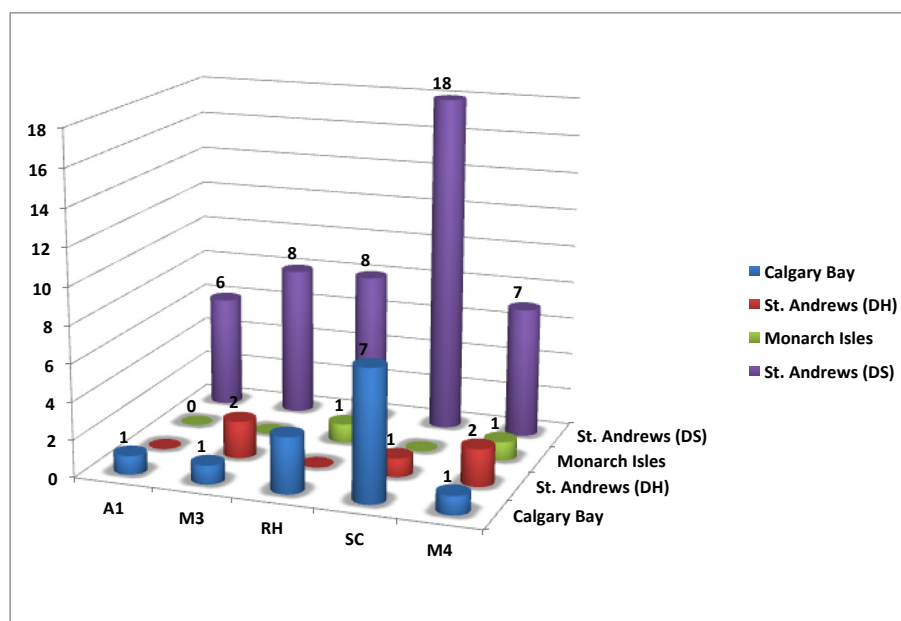

Figure S1. A total of sixty-seven bacteria by Scottish isolation location and media.

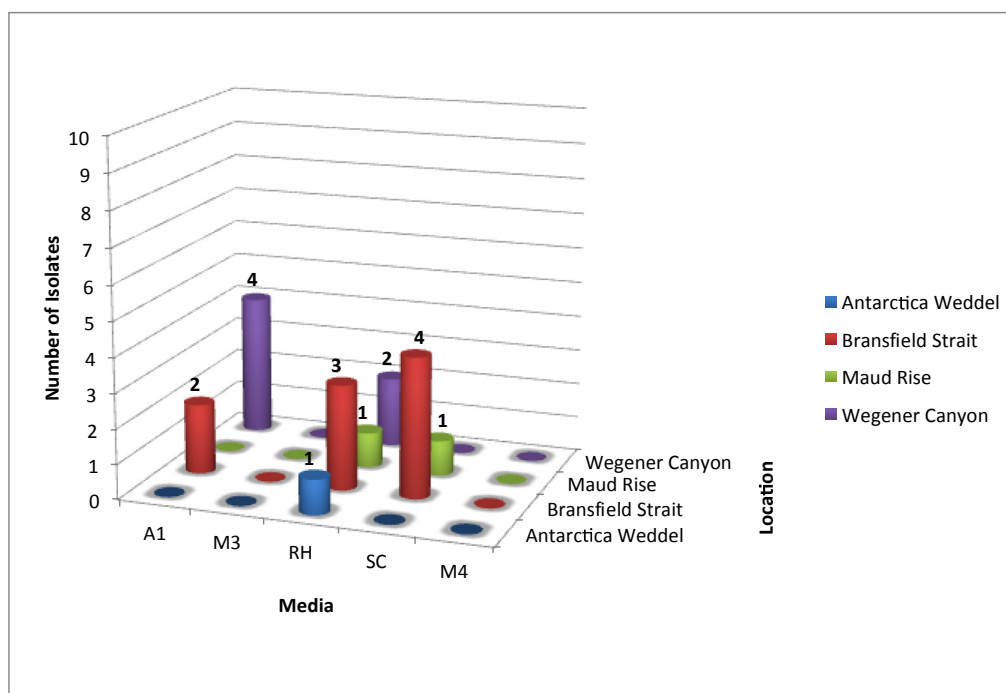

Figure S2. A total of eighteen bacteria by Antarctica isolation location and media.

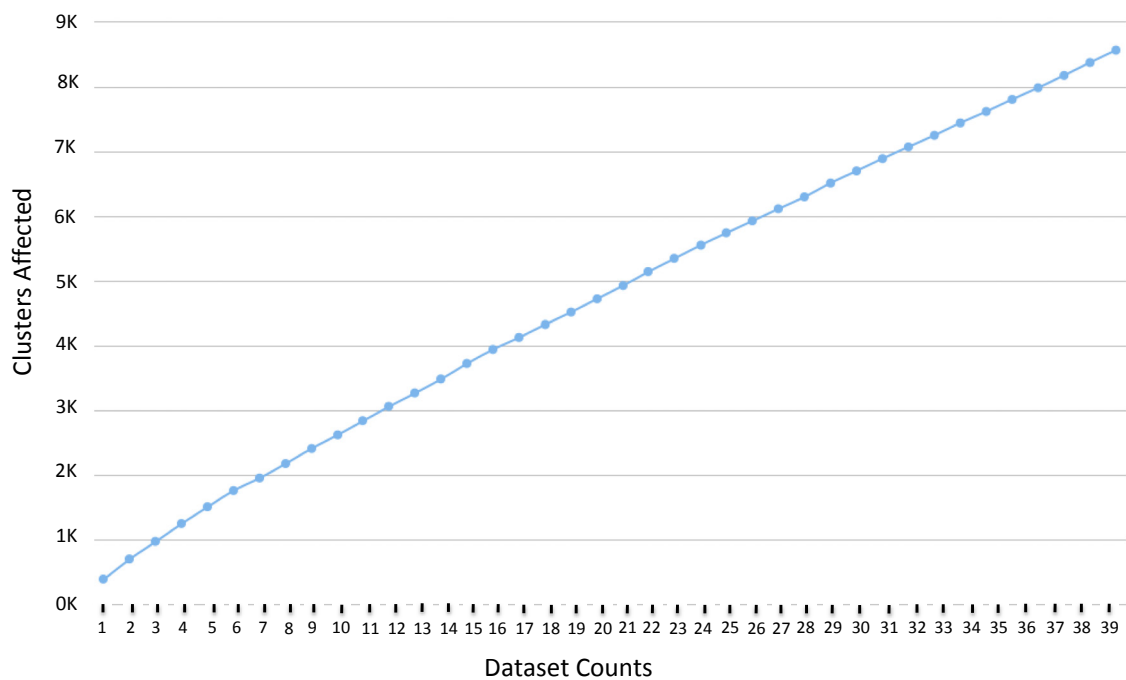

**Figure S3.** Rarefaction curve of MS/MS spectra diversity for the molecular network of 3558 parent ions from 38 bacteria strains (Figure 2) where clusters affected is the number of spectra in each data file (strain) and dataset counts is the number of strains added.

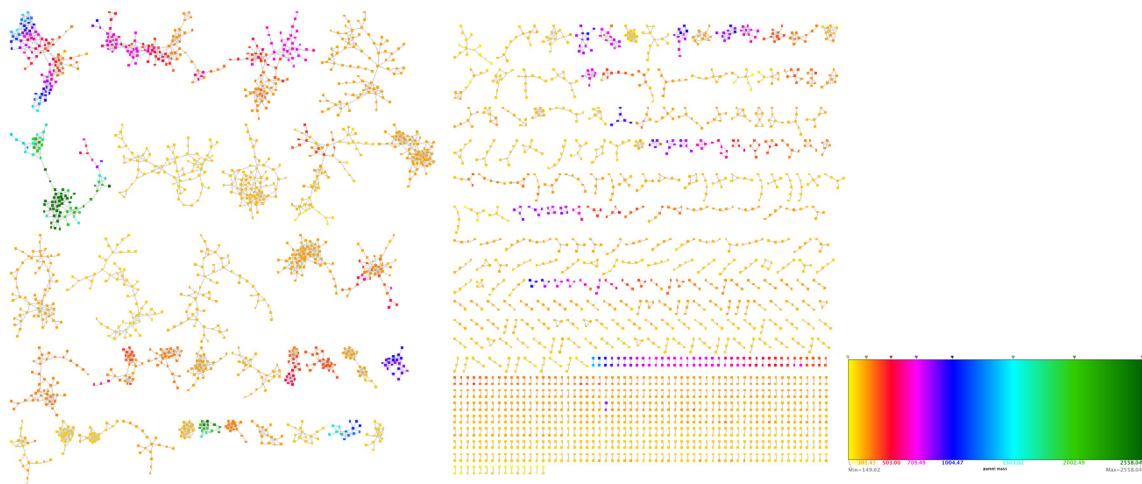

**Figure S4.** Molecular network by parent ion  $m/z$ , comprising 3558 nodes, colours indicate parent ion mass ranges from  $m/z$  149 to 2558 as indicated in the LEGEND.

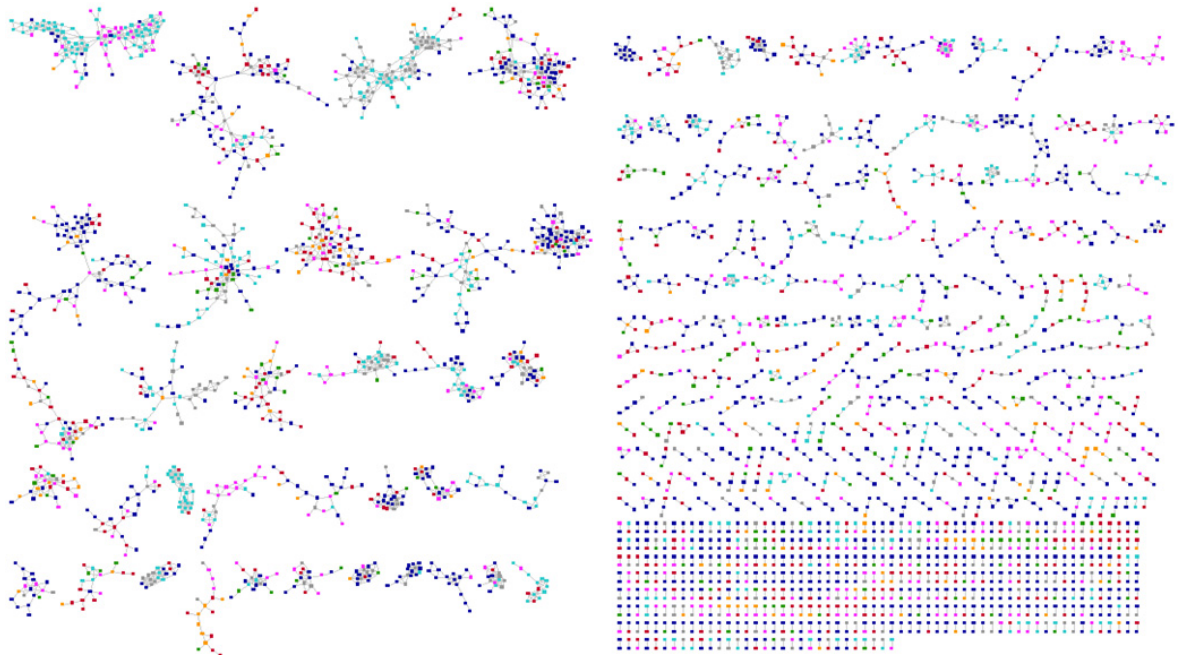

**Figure S5.** Molecular Network comprising 3395 nodes. The nodes are colour coded by strain taxonomy at the genus level: 21 *Bacillus* spp. (dark blue), seven *Streptomyces* spp. (red); three *Kocuria* spp. (green); two *Micromonospora* spp. (orange); four unidentified and one *Micrococcus* sp. (pink); compounds shared between taxa (light blue) and media components (grey).

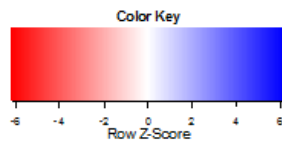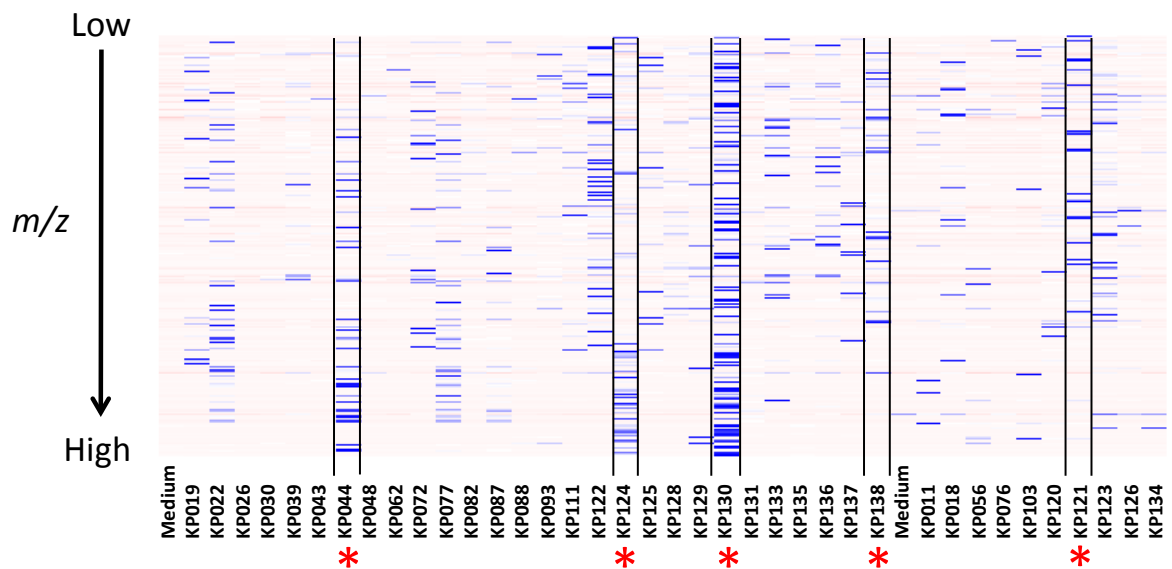

**Figure S6.** Heat map of 38 bacterial fermentation extracts based on mass spectrometry data indicating the distinct metabolic profiles amongst the strains. The strains observed as outliers in PCA are labelled with an asterisk \*.

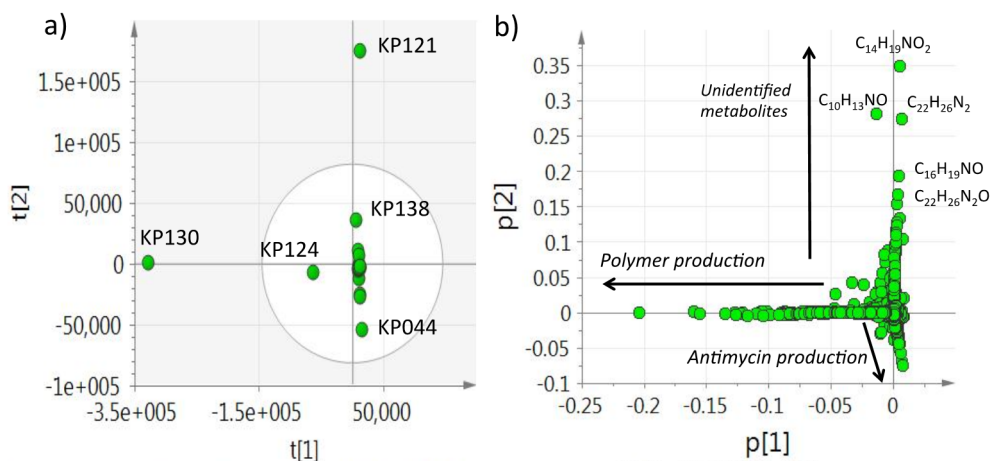

**Figure S7.** (a) Principle component analysis scoring plot of 38 bacterial fermentation extracts based on mass spectrometry data indicating outlier strains with novel chemistry; (b) Loadings plot indicating metabolites present in outlying extracts responsible for separation observed in scoring plot.

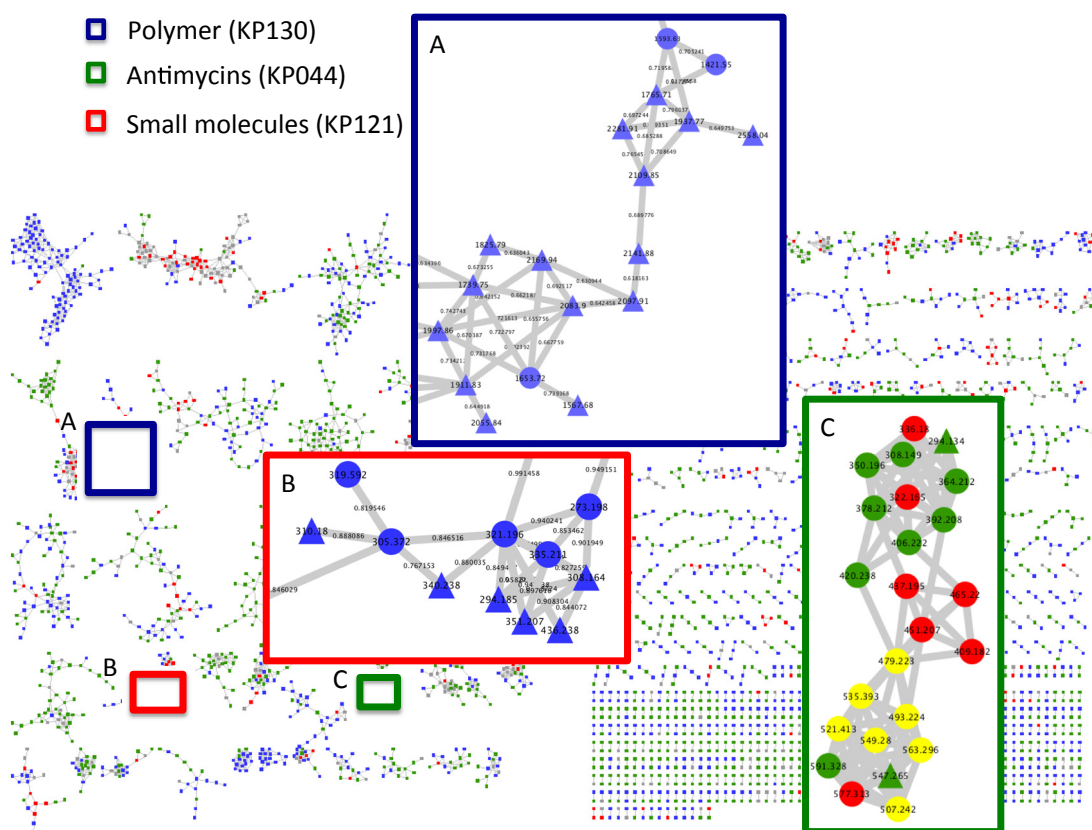

**Figure S8.** Molecular network using HR-MS/MS data of fermentation extracts from 38 bacteria strains (Figure 2), highlighting metabolites that have contributed to the strains being identified as outliers in PCA analysis (Figure S6). Metabolites include (A) a polymer series produced by strain KP130 (triangle nodes) and strains KP124 and KP130 (circle nodes) (B) small molecules below  $m/z$  350) produced by strain KP121 (triangle nodes) and up to seven strains including KP121 (circle nodes) and (C) antimycins (yellow nodes) produced by strain KP044 and up to eight strains including KP044. All nodes depicted in boxes A–C are detailed in Table S2.

**Table S1.** Taxonomic identification of 85 bacterial isolates, derived through the NCBI (National Centre for Biotechnology Information) Megablast Search Tool (BLASTx) database. The query coverage (QC) is a measure of the coverage of the isolated 16S rRNA gene sequences against the query matches, whilst the sequence identity (ID) is the percentage identity to the database gene sequence. References marked with a \* indicate isolates chosen for chemical investigation.

| Reference | Accession Number | Sequence Length (bp) | BLASTn Hit                          | QC %  | ID % | Accession Number of Closest BLASTn Hit | Location     | Media | Pre-Treatment |
|-----------|------------------|----------------------|-------------------------------------|-------|------|----------------------------------------|--------------|-------|---------------|
| KP011 *   | -                | -                    | -                                   | -     | -    | -                                      | St. Andrews  | SC    | DH            |
| KP018 *   | KT200430         | 1049                 | <i>Micrococcus yunnanensis</i>      | 99.81 | 100  | NR_116578                              | Monach Isles | RH    | DH            |
| KP019 *   | KT200431         | 1118                 | <i>Micromonospora saelicesensis</i> | 100   | 99.6 | NR_042312                              | Monach Isles | M4    | DH            |
| KP020     | KT200432         | 1153                 | <i>Bacillus simplex</i>             | 98.88 | 98.6 | NR_114919                              | St. Andrews  | AI    | DS            |
| KP021     | KT200433         | 1160                 | <i>Bacillus simplex</i>             | 99.15 | 98.7 | NR_114919                              | St. Andrews  | AI    | DS            |
| KP022r*   | KT200434         | 1058                 | <i>Streptomyces coelicolor</i>      | 100   | 99.4 | NR_116633                              | St. Andrews  | AI    | DS            |
| KP023     | KT200435         | 1134                 | <i>Bacillus</i> sp.                 | 99.12 | 99.6 | HM567027                               | St. Andrews  | AI    | DS            |
| KP024     | KT200436         | 1162                 | <i>Bacillus</i> sp.                 | 100   | 99.8 | KJ734005                               | St. Andrews  | AI    | DS            |
| KP025     | KT200437         | 1136                 | <i>Bacillus megaterium</i>          | 99.65 | 98.2 | KJ526880                               | St. Andrews  | AI    | DS            |
| KP026 *   | KT200438         | 1209                 | <i>Bacillus aryabhatai</i>          | 99.92 | 99.7 | LN827734                               | St. Andrews  | M3    | DS            |
| KP027     | KT200439         | 1137                 | <i>Streptomyces somaliensis</i>     | 99.74 | 99.9 | KF973303                               | St. Andrews  | RH    | DS            |
| KP028     | KT200440         | 1135                 | <i>Bacillus licheniformis</i>       | 99.04 | 98.9 | KJ842640                               | St. Andrews  | RH    | DS            |
| KP030 *   | KT200441         | 1220                 | <i>Bacillus licheniformis</i>       | 100   | 99.7 | KC342874                               | St. Andrews  | RH    | DS            |
| KP031     | KT200442         | 1150                 | <i>Bacillus flexus</i>              | 99.05 | 98.9 | NR_113800                              | St. Andrews  | RH    | DS            |
| KP032     | KT200443         | 1013                 | <i>Bacillus licheniformis</i>       | 97.87 | 98.7 | KC813166                               | St. Andrews  | RH    | DS            |
| KP036     | KT200444         | 1175                 | <i>Paenibacillaceae</i> sp.         | 98.9  | 99.6 | FM174172                               | St. Andrews  | RH    | DS            |
| KP038     | KT200445         | 1158                 | <i>Bacillus simplex</i>             | 98.72 | 98   | HF584767                               | St. Andrews  | RH    | DS            |
| KP039 *   | KT200446         | 1137                 | <i>Bacillus pumilus</i>             | 100   | 99.7 | KP224308                               | St. Andrews  | RH    | DS            |
| KP040     | KT200447         | 1129                 | <i>Bacillus licheniformis</i>       | 98.78 | 99.5 | KC519411                               | St. Andrews  | SC    | DS            |
| KP041     | KT200448         | 1122                 | <i>Bacillus simplex</i>             | 99.29 | 99.9 | NR_114919                              | St. Andrews  | SC    | DS            |
| KP043 *   | KT200449         | 1138                 | <i>Micromonospora saelicesensis</i> | 99.74 | 99.8 | JN862845                               | St. Andrews  | SC    | DS            |
| KP044 *   | KT200450         | 1124                 | <i>Streptomyces coelicolor</i>      | 100   | 99.6 | NR_116633                              | St. Andrews  | SC    | DS            |
| KP045     | KT200451         | 1120                 | <i>Bacillus licheniformis</i>       | 99.29 | 100  | KJ842635                               | St. Andrews  | SC    | DS            |
| KP048 *   | KT200452         | 1106                 | <i>Streptomyces albidoflavus</i>    | 100   | 99.6 | LN626361                               | St. Andrews  | SC    | DS            |
| KP050     | KT200453         | 1153                 | <i>Bacillus licheniformis</i>       | 99.14 | 99.7 | KF896091                               | St. Andrews  | SC    | DS            |
| KP051     | KT200454         | 961                  | <i>Bacillus licheniformis</i>       | 100   | 97.8 | JN366714                               | St. Andrews  | SC    | DS            |
| KP052     | KT200455         | 1140                 | <i>Bacillus licheniformis</i>       | 99.04 | 99.7 | KJ842635                               | St. Andrews  | SC    | DS            |
| KP053     | KT200456         | 1125                 | <i>Bacillus</i> sp.                 | 98.94 | 100  | KM675938                               | St. Andrews  | SC    | DS            |
| KP055     | KT200457         | 1123                 | <i>Bacillus</i> sp.                 | 99.64 | 99.8 | EU584553                               | St. Andrews  | SC    | DS            |
| KP056 *   | KT200458         | 1063                 | <i>Bacillus licheniformis</i>       | 99.53 | 99.8 | KJ842640                               | St. Andrews  | SC    | DS            |

|            |          |      |                                   |       |      |           |             |    |    |
|------------|----------|------|-----------------------------------|-------|------|-----------|-------------|----|----|
| KP057      | KT200459 | 1125 | <i>Bacillus</i> sp.               | 99.03 | 99.8 | KM675938  | St. Andrews | SC | DS |
| KP058      | KT200460 | 1131 | <i>Bacillus</i> sp.               | 98.78 | 98.6 | KM369837  | St. Andrews | SC | DS |
| KP060      | KT200461 | 1138 | <i>Micromonospora</i> sp.         | 99.3  | 99   | KF494813  | St. Andrews | SC | DS |
| KP061      | KT200462 | 1105 | <i>Verrucosipora</i> sp.          | 96.17 | 98   | JF346418  | St. Andrews | SC | DS |
| KP062 *    | KT200463 | 1071 | <i>Bacillus licheniformis</i>     | 100   | 99.3 | HG799978  | St. Andrews | SC | DS |
| KP063      | KT200464 | 1110 | <i>Micromonospora</i> sp.         | 99.37 | 99.9 | JQ782955  | St. Andrews | SC | DS |
| KP064      | KT200465 | 1105 | <i>Streptomyces fungicidicus</i>  | 99.37 | 99.8 | KF990583  | St. Andrews | M4 | DS |
| KP065      | KT200466 | 1091 | <i>Streptomyces albidoflavus</i>  | 100   | 99.3 | LN626360  | St. Andrews | M4 | DS |
| KP066      | KT200467 | 1151 | <i>Bacillus marisflavi</i>        | 97.29 | 98.2 | HE804783  | St. Andrews | M4 | DS |
| KP067      | KT200468 | 1090 | <i>Bacillus</i> sp.               | 99    | 100  | KF933696  | St. Andrews | M4 | DS |
| KP069      | KT200469 | 1092 | <i>Streptomyces fungicidicus</i>  | 99.73 | 99.8 | KF742498  | St. Andrews | M4 | DS |
| KP070      | KT200470 | 1103 | <i>Streptomyces violascens</i>    | 99.91 | 99.5 | KJ571044  | St. Andrews | M4 | DS |
| KP071      | KT200471 | 1101 | <i>Bacillus</i> sp.               | 98.92 | 99.6 | KC887502  | Calgary Bay | AI | DS |
| KP072 *    | KT200472 | 1157 | <i>Bacillus simplex</i>           | 99.91 | 98.9 | NR_114919 | Calgary Bay | RH | DS |
| KP073      | KT200473 | 1182 | <i>Bacillus simplex</i>           | 99.33 | 99.7 | KF818647  | Calgary Bay | RH | DS |
| KP074      | KT200474 | 1230 | <i>Bacillus licheniformis</i>     | 99.19 | 99.3 | KF896091  | Calgary Bay | SC | DS |
| KP076 *    | KT200475 | 1135 | <i>Bacillus hwajinpoensis</i>     | 100   | 99.4 | NR_025264 | Calgary Bay | SC | DS |
| KP077 *    | KT200476 | 1096 | <i>Bacillus hwajinpoensis</i>     | 100   | 100  | NR_025264 | Calgary Bay | SC | DS |
| KP079      | KT200477 | 1099 | <i>Bacillus hwajinpoensis</i>     | 99.01 | 99.9 | KF933706  | Calgary Bay | SC | DS |
| KP081      | KT200478 | 1229 | <i>Bacillus licheniformis</i>     | 99.19 | 99.5 | EU816690  | Calgary Bay | SC | DS |
| KP082 *    | KT200479 | 1059 | <i>Streptomyces daghestanicus</i> | 100   | 99.6 | KM036200  | Calgary Bay | SC | DS |
| KP083      | KT200480 | 1216 | <i>Bacillus hwajinpoensis</i>     | 99.26 | 99.1 | KF933706  | Calgary Bay | SC | DS |
| KP086      | KT200481 | 1097 | <i>Bacillus hwajinpoensis</i>     | 99.1  | 99.9 | KM369837  | Calgary Bay | M4 | DS |
| KP087 *    | KT200482 | 1047 | <i>Streptomyces albidoflavus</i>  | 100   | 99.8 | LN626361  | St. Andrews | M3 | DH |
| KP088 *    | KT200483 | 1105 | <i>Bacillus hwajinpoensis</i>     | 99.82 | 99.6 | KF933706  | St. Andrews | M3 | DS |
| KP091      | KT200484 | 1068 | <i>Bacillus licheniformis</i>     | 99.53 | 99.9 | KC456634  | St. Andrews | M3 | DS |
| KP092      | KT200485 | 1194 | <i>Bacillus altitudinis</i>       | 99.58 | 99.9 | NR_118439 | St. Andrews | M3 | DS |
| KP093 *    | KT200486 | 1137 | <i>Bacillus licheniformis</i>     | 99.82 | 99.5 | KF896091  | St. Andrews | M3 | DS |
| KP094      | KT200487 | 1075 | <i>Verrucosipora</i> sp.          | 100   | 99.9 | KM370030  | St. Andrews | M3 | DS |
| KP095      | KT200488 | 1245 | <i>Streptomyces exfoliatus</i>    | 100   | 99   | NR_041229 | St. Andrews | M3 | DH |
| KP097      | KT200489 | 1075 | <i>Bacillus</i> sp.               | 99.17 | 100  | KM67938   | St. Andrews | M3 | DS |
| KP098      | KT200490 | 1099 | <i>Paenibacillus xylanexedens</i> | 99.37 | 99   | KF562253  | Calgary Bay | RH | DS |
| KP101      | KT20049t | 1073 | <i>Staphylococcus warneri</i>     | 99.17 | 100  | HG799952  | St. Andrews | M3 | DS |
| KP103(2) * | KT200492 | 1252 | <i>Bacillus hwajinpoensis</i>     | 99.04 | 98.7 | NR_025265 | Calgary Bay | M3 | DS |
| KP105      | KT200493 | 399  | <i>Paenibacillus pasadenensis</i> | 95.89 | 96.2 | NR_113987 | St. Andrews | M4 | DS |
| KP107      | KT200494 | 1081 | <i>Paenibacillaceae</i> sp.       | 99.17 | 99.8 | FM174172  | St. Andrews | M4 | DH |

|         |          |      |                                  |       |      |           |                   |    |     |
|---------|----------|------|----------------------------------|-------|------|-----------|-------------------|----|-----|
| KP109   | KT200495 | 1258 | <i>Bacillus subtilis</i>         | 99.05 | 98.6 | JF701929  | St. Andrews       | M4 | DH  |
| KP111 * | KT200496 | 990  | <i>Kocuria</i> sp.               | 99.9  | 99.9 | KM507644  | Antarctica Weddel | RH | DS  |
| KP120 * | KT200497 | 1133 | <i>Bacillus licheniformis</i>    | 100   | 99.8 | NR_118996 | Bransfield Strait | RH | DS  |
| KP121 * | KT200498 | 1095 | <i>Bacillus licheniformis</i>    | 100   | 99.5 | NR_118996 | Bransfield Strait | RH | DS  |
| KP122 * | -        | -    | -                                | -     | -    | -         | Bransfield Strait | SC | DS  |
| KP123 * | KT200499 | 1136 | <i>Bacillus</i> sp.              | 100   | 99.6 | KF896091  | Bransfield Strait | SC | DS  |
| KP124 * | KT200500 | 1026 | <i>Bacillus sonorensis</i>       | 99.9  | 99.6 | KP164479  | Bransfield Strait | RH | DS  |
| KP125 * | KT200501 | 797  | <i>Bacillus</i> sp.              | 100   | 99.7 | KM675938  | Bransfield Strait | AI | DS  |
| KP126 * | KT200502 | 1137 | <i>Bacillus</i> sp.              | 99.91 | 99.5 | KF896091  | Bransfield Strait | AI | DS  |
| KP128 * | KT200503 | 1119 | <i>Bacillus licheniformis</i>    | 100   | 99.6 | HG799978  | Bransfield Strait | SC | DS  |
| KP129 * | KT200504 | 1120 | <i>Bacillus</i> sp.              | 100   | 99.8 | KF896091  | Bransfield Strait | SC | DS  |
| KP130 * | -        | -    | -                                | -     | -    | -         | Maud Rise         | RH | N/A |
| KP131 * | KT200505 | 1162 | <i>Streptomyces albidoflavus</i> | 99.91 | 99.3 | LN626361  | Maud Rise         | SC | N/A |
| KP134 * | KT200506 | 1125 | <i>Streptomyces champavatii</i>  | 100   | 99.8 | NR_115669 | Wegener Canyon    | AI | DS  |
| KP133 * | -        | -    | -                                | -     | -    | -         | Wegener Canyon    | AI | DS  |
| KP135 * | KT200507 | 1023 | <i>Kocuria rhizophila</i>        | 100   | 99.7 | NR_026452 | Wegener Canyon    | RH | DS  |
| KP136 * | KT200508 | 1143 | <i>Kocuria rhizophila</i>        | 100   | 99.7 | EU554435  | Wegener Canyon    | RH | DS  |
| KP137 * | KT200509 | 1093 | <i>Bacillus licheniformis</i>    | 99.73 | 99.7 | JX625995  | Wegener Canyon    | AI | DS  |
| KP138 * | KT200510 | 1120 | <i>Bacillus</i> sp.              | 100   | 99.7 | KF896091  | Wegener Canyon    | AI | DS  |

**Table S2.** Correlation of parent ions contributing to strains identified as outliers in PCA analysis (Figure S6) to parent ions in the molecular network (Figure 2) as depicted in Figure S7 boxes A–C.

| Compound                                      | Network<br><i>m/z</i> | PCA<br><i>m/z</i> | Network Strain                                            |
|-----------------------------------------------|-----------------------|-------------------|-----------------------------------------------------------|
| Polymer                                       | 1421.55               |                   | KP124, KP130                                              |
|                                               | 1567.68               |                   | KP130                                                     |
|                                               | 1593.63               |                   | KP124, KP130                                              |
|                                               | 1653.72               |                   | KP124, KP130                                              |
|                                               | 1739.75               |                   | KP130                                                     |
|                                               | 1765.71               |                   | KP130                                                     |
|                                               | 1825.79               |                   | KP130                                                     |
|                                               | 1911.83               |                   | KP130                                                     |
|                                               | 1937.77               |                   | KP130                                                     |
|                                               | 1997.86               |                   | KP130                                                     |
|                                               | 2055.84               |                   | KP130                                                     |
|                                               | 2083.9                |                   | KP130                                                     |
|                                               | 2097.91               |                   | KP130                                                     |
|                                               | 2109.85               |                   | KP130                                                     |
|                                               | 2141.88               |                   | KP130                                                     |
|                                               | 2169.94               |                   | KP130                                                     |
|                                               | 2281.91               |                   | KP130                                                     |
| 2558.04                                       |                       | KP130             |                                                           |
| Unknown small molecules <350 <i>m/z</i>       | 273.198               |                   | KP121, KP122                                              |
|                                               | 294.185               |                   | KP121                                                     |
|                                               | 305.372               |                   | KP121, KP122, KP123, KP126,<br>KP128, KP130, KP136        |
|                                               | 308.164               |                   | KP121                                                     |
|                                               | 310.18                |                   | KP121                                                     |
|                                               | 319.592               | 319.217           | KP121, KP122, KP126, KP138                                |
|                                               | 321.196               | 321.196           | KP121, KP122                                              |
|                                               | 335.211               | 335.212           | KP121, KP136, KP130, KP138                                |
|                                               | 340.238               |                   | KP121                                                     |
|                                               | 351.207               |                   | KP121                                                     |
| 436.238                                       |                       | KP121             |                                                           |
| Antimycin A6, A18                             | 479.223               | 479.203           | KP077, KP087, KP044                                       |
| Antimycin A5                                  | 493.224               | 493.218           | KP022, KP077, KP044                                       |
| Antimycin A4b, A20                            | 507.242               | 507.234           | KP022, KP077, KP087, KP044                                |
| Antimycin A3b, A4a, A7a, A7b                  | 521.413               | 521.249           | KP131, KP138, KP022,<br>KP077, KP087, KP044               |
| Antimycin A2a, A2b, A8a, A8b, A11, A17        | 535.393               | 535.265           | KP124, KP131, KP022,<br>KP077, KP087, KP044               |
| Antimycin A0b, A1b, A12, A13, A19             | 549.28                | 549.280           | KP131, KP138, KP022, KP077,<br>KP087, KP039, KP044, KP082 |
| Antimycin A0a, A0c, A0d, A10a, A10b, A14, A15 | 563.296               | 563.296           | KP022, KP077, KP087, KP044                                |

**Table S3.** Bioactivity testing of fermentation extracts from 38 strains and two media blank crude extracts against epithelial colon adenocarcinoma cells (Caco-2) and “normal” human fibroblasts (HS27) and prostate cells (PNT2a). Activity is measured in percentage of viable cells. nt = not tested, red font indicates results considered active.

| Cell Line                      | CaCo-2 Viability<br>(Percentage) | HS27 Viability<br>(Percentage) | PNT2a Viability<br>(Percentage) |
|--------------------------------|----------------------------------|--------------------------------|---------------------------------|
| Extract Concentration<br>µg/mL | 50                               | 30                             | 100                             |
| Extract Reference<br>KP111     | 101                              | 86                             | 87                              |



|             |     |     |     |     |    |
|-------------|-----|-----|-----|-----|----|
| KP122       | 106 | 98  | 99  | 96  | 92 |
| KP125       | 91  | 90  | 91  | 100 | 88 |
| KP128       | 93  | 97  | 97  | 98  | 95 |
| KP129       | 97  | 100 | 100 | 97  | 97 |
| KP022       | 25  | 106 | 113 | 91  | 87 |
| KP026       | 93  | 97  | 95  | 94  | 94 |
| KP043       | 89  | 96  | 94  | 96  | 94 |
| KP048       | 107 | 98  | 97  | 96  | 93 |
| KP077       | 23  | 104 | 109 | 74  | 66 |
| KP087       | 24  | 107 | 104 | 92  | 89 |
| KP093       | 108 | 101 | 98  | 96  | 97 |
| KP019       | 107 | 98  | 90  | 91  | 83 |
| KP030       | 110 | 98  | 101 | 94  | 94 |
| KP039       | 37  | 112 | 104 | 94  | 93 |
| KP044       | 22  | 114 | 110 | 91  | 86 |
| KP072       | 105 | 107 | 104 | 81  | 89 |
| KP082       | 20  | 107 | 101 | 93  | 94 |
| KP088       | 53  | 102 | 99  | 92  | 95 |
| KP124       | 100 | 100 | 93  | 88  | 92 |
| KP062       | 97  | 101 | 101 | 94  | 98 |
| KP131       | 22  | 106 | 92  | 91  | 92 |
| KP138       | 72  | 102 | 102 | 90  | 96 |
| KP133       | 110 | 98  | 98  | 94  | 96 |
| KP137       | 112 | 99  | 95  | 90  | 92 |
| KP136       | 109 | 93  | 95  | 93  | 95 |
| KP135       | 107 | 95  | 98  | 93  | 93 |
| KP130       | 103 | 103 | 97  | 95  | 98 |
| Media Blank | 86  | 95  | 97  | 95  | 94 |
| KP134       | 104 | 97  | 99  | nt  | nt |
| KP123       | 102 | 97  | 100 | nt  | nt |
| KP018       | 105 | 82  | 90  | nt  | nt |
| KP076       | 100 | 94  | 101 | nt  | nt |
| KP011       | 105 | 98  | 100 | nt  | nt |
| KP056       | 104 | 97  | 101 | nt  | nt |
| KP103       | 100 | 94  | 98  | nt  | nt |
| KP120       | 93  | 82  | 88  | nt  | nt |
| KP121       | 101 | 109 | 108 | nt  | nt |
| KP126       | 102 | 97  | 101 | nt  | nt |
| Media Blank | 107 | 103 | 103 | nt  | nt |

---
